# Supplementary material for: Assessment of Immunological Features in Muscle-Invasive Bladder Cancer Prognosis Using Ensemble Learning
Source: MDPI journal article supplement (doi:10.3390/cancers13071624), 2021-04-01
Supplement: s1 [file s1]

# Assessment of immunological features in muscle-invasive bladder cancer prognosis

Christos G Gavriel<sup>1,\*</sup>, Neofytos Dimitriou<sup>2,\*</sup>, Nicolas Brieu<sup>3</sup>, Ines P Nearchou<sup>1</sup>, Ognjen Arandjelović<sup>2</sup>, Günter Schmidt<sup>3</sup>, David J Harrison<sup>1,4</sup>, and Peter D Caie<sup>1</sup>

<sup>1</sup>School of Medicine, University of St Andrews, St Andrews, United Kingdom

<sup>2</sup>School of Computer Science, University of St Andrews, St Andrews, United Kingdom

<sup>3</sup>Definiens GmbH, Munich, Germany

<sup>4</sup>NHS Lothian, University Hospitals Division, Edinburgh, United Kingdom

\*Equal Contribution

## Supplementary Information

**Table S1.** Immunofluorescence primary antibodies.

| Antibody | Supplier             | Catalogue number    | Species           | Dilution |
|----------|----------------------|---------------------|-------------------|----------|
| CD3      | Agilent Technologies | A0452               | Rabbit-Polyclonal | 1:400    |
| CD8      | Agilent Technologies | M7103-Clone C8/144B | Mouse-Polyclonal  | 1:200    |
| CD68     | Cell Signaling       | D4B9C               | Rabbit-Monoclonal | 1:3000   |
| CD163    | Cell Marque          | MRQ-26              | Mouse-Monoclonal  | 1:3000   |
| PD-L1    | Cell Signaling       | 13684S              | Rabbit-Monoclonal | 1:100    |
| PanCK    | Agilent Technologies | Z0622               | Rabbit-Polyclonal | 1:100    |

**Table S2.** Detection and visualization reagents for target proteins.

| Dye             | Supplier                | Catalogue number | Dilution |
|-----------------|-------------------------|------------------|----------|
| FITC            | Perkin Elmer            | NEL741B001KT     | 1:100    |
| CY3             | Perkin Elmer            | NEL744B001KT     | 1:100    |
| CY5             | Perkin Elmer            | NEL745B001KT     | 1:100    |
| Alexa Fluor 750 | ThermoFisher Scientific | S21384           | 1:50     |

**Table S3.** Summary of each immunofluorescence target. Visualization and imaging acquisition information.

| Target             | Dye name | Excitation wavelength (nm) | Emission wavelength (nm) | Exposure time (ms) |
|--------------------|----------|----------------------------|--------------------------|--------------------|
| Nucleic acid (DNA) | Hoechst  | 353                        | 465                      | 10                 |
| CD3 or CD68        | FITC     | 495                        | 519                      | 10                 |
| PD-L1              | CY3      | 548                        | 561                      | 10                 |
| CD8 or CD163       | CY5      | 650                        | 673                      | 10                 |
| PanCK              | CY7      | 747                        | 773                      | 600                |

**Table S4.** The search space of each classifier based on predefined distributions over its hyperparameters.

| Classifier | Hyperparameter   | Distribution        | Values                                     |
|------------|------------------|---------------------|--------------------------------------------|
| LSVM       | C                | Log-uniform         | $[\ln(1e-5), \ln(1e2)]$                    |
|            | Class weight     | Categorical         | [Balanced, None]                           |
| RSVM       | C                | Log-uniform         | $[\ln(1e-5), \ln(1e2)]$                    |
|            | Gamma            | Log-uniform         | $1/\max\_features * [\ln(1e-3), \ln(1e3)]$ |
| LR         | Class weight     | Categorical         | [Balanced, None]                           |
|            | Type of penalty  | Categorical         | [l1, l2, Elastic net, None]                |
|            | C                | Log-uniform         | $[\ln(1e-5), \ln(1e2)]$                    |
| DT         | L1 ratio         | Uniform             | [0, 1]                                     |
|            | Class weight     | Categorical         | [Balanced, None]                           |
|            | Criterion        | Categorical         | [Gini, Entropy]                            |
| RF         | Maximum features | Uniform integer     | [1, max_features]                          |
|            | Maximum depth    | Categorical         | [1, 15] or None                            |
|            | Class weight     | Categorical         | [Balanced, None]                           |
|            | Number of trees  | Log-uniform integer | [10, 1000]                                 |
| KNN        | Criterion        | Categorical         | [Gini, Entropy]                            |
|            | Maximum features | Uniform integer     | [1, max_features]                          |
|            | Maximum depth    | Categorical         | [2, 3, 4, None]                            |
|            | Bootstrap        | Categorical         | [True, False]                              |
|            | Class weight     | Categorical         | [Balanced, None]                           |
| KNN        | K                | Log-uniform integer | [1, 20]                                    |
|            | Metric           | Categorical         | [Balanced, None]                           |
|            | P                | Uniform integer     | [1, 6]                                     |

**Table S5.** Results for algorithm selection from the nested cross validation on the training set with AUROC as the performance metric. For each feature space, the best ML classifier is indicated in bold. Amongst the best classifiers of each feature space (in bold), our ensemble model uses those with a marked difference in performance (\*\*).

| Feature Space              | LR                   | KNN        | LSVM                | RSVM        | DT                  | RF                  |
|----------------------------|----------------------|------------|---------------------|-------------|---------------------|---------------------|
| Image                      | 69.8 ± 13.3          | 61.8 ± 5.7 | <b>**72.8 ± 0.3</b> | 60.8 ± 8.2  | 63.3 ± 3.3          | 57.8 ± 3.2          |
| Clinical                   | <b>58.1 ± 0.1</b>    | 59.8 ± 7.2 | 55.9 ± 5.9          | 48.6 ± 5.6  | 50.1 ± 2.4          | 56.6 ± 9.1          |
| Spatial                    | 46.8 ± 3.3           | 46.2 ± 4.7 | 42.7 ± 1.8          | 38.0 ± 0.0  | <b>49.2 ± 3.3</b>   | 43.7 ± 13.0         |
| Image & clinical           | 62.0 ± 0.6           | 55.3 ± 4.4 | 56.5 ± 8.5          | 50.1 ± 11.5 | <b>**68.8 ± 0.8</b> | 70.4 ± 7.9          |
| Image & spatial            | <b>**70.2 ± 14.7</b> | 59.9 ± 2.4 | 49.0 ± 2.5          | 58.6 ± 11.9 | 51.0 ± 1.5          | 64.1 ± 7.6          |
| Clinical & spatial         | 44.3 ± 9.8           | 49.4 ± 3.2 | <b>57.9 ± 2.4</b>   | 47.1 ± 4.4  | 44.8 ± 2.7          | 46.6 ± 15.4         |
| Image & clinical & spatial | 56.3 ± 0.2           | 55.0 ± 4.0 | 60.2 ± 8.2          | 61.4 ± 4.6  | 66.6 ± 9.1          | <b>**67.3 ± 5.8</b> |

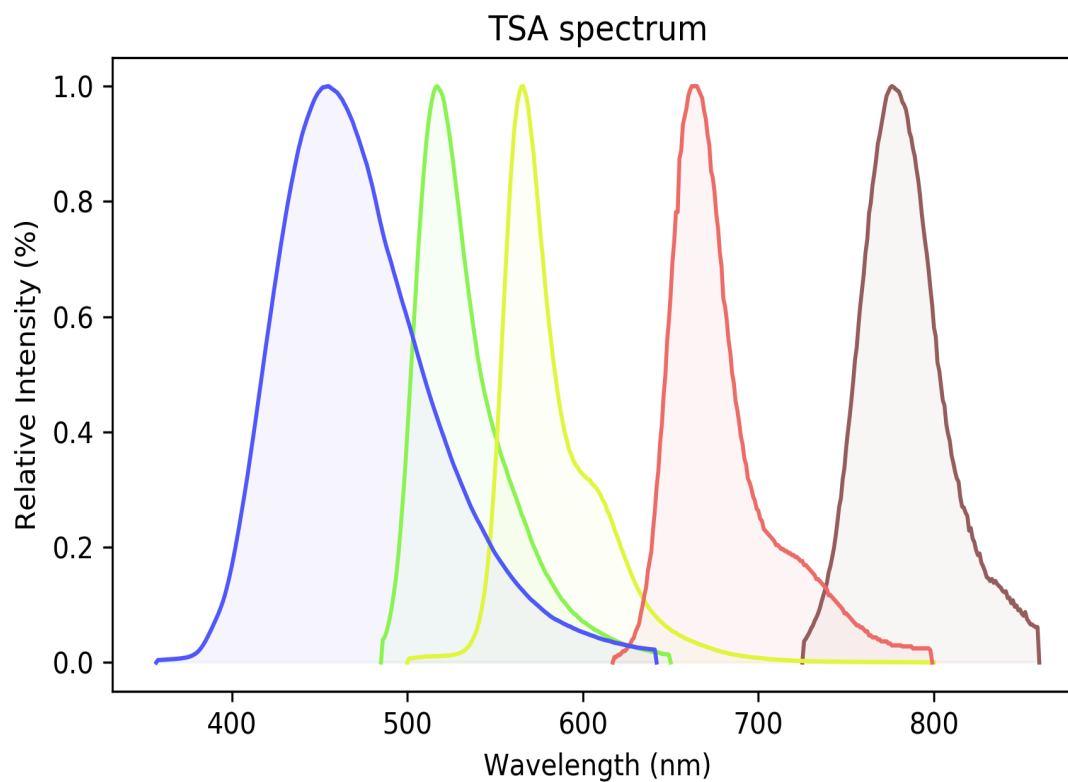

**Figure S1.** Tyramide signal amplification spectra for antibody visualisation. *Hoechst: Blue, FITC: Green, CY3: Yellow, CY5: Soft red, Alexa Fluor 750 (CY7): Dark red.*

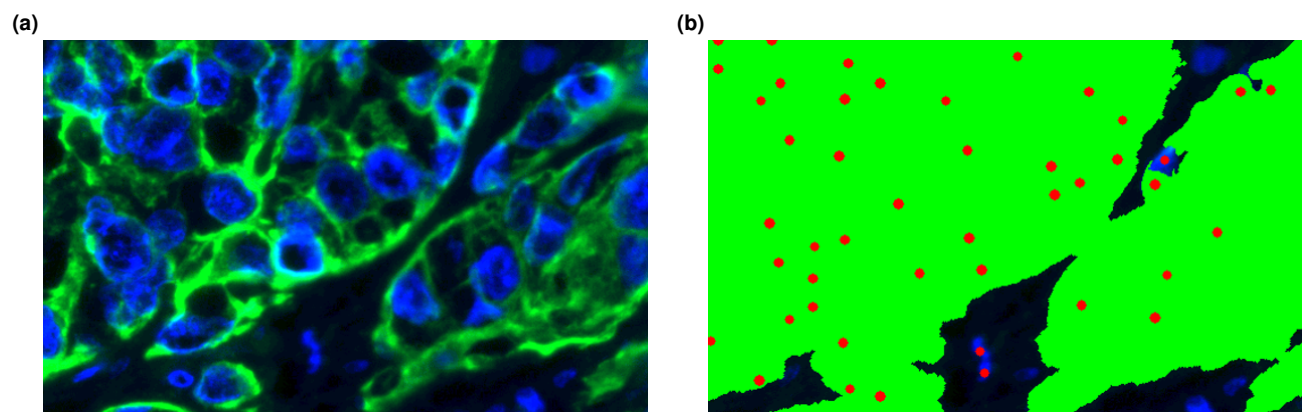

**Figure S2.** (a) Immunofluorescence region visualised using the PanCK (green) and Hoechst (blue) channels, (b) The corresponding epithelium segmentation mask of (a) along with the detected cell nuclei in red dots.

**Table S6.** Pairwise comparison between TNM staging groups. Stages IIIA and IIIB were merged due to having the largest  $p$  value.

| TNM  | II      | IIIA    | IIIB    |
|------|---------|---------|---------|
| IIIA | 0.33792 | -       | -       |
| IIIB | 0.50382 | 0.93012 | -       |
| IV   | 0.00087 | 0.00317 | 0.07361 |

**Table S7.** Pairwise comparison between TNM staging groups. Stages II and IIIA-IIIIB were merged due to having the largest  $p$  value.

| TNM        | II      | IIIA-IIIIB |
|------------|---------|------------|
| IIIA-IIIIB | 0.21458 | -          |
| IV         | 0.00034 | 0.00034    |

**Table S8.** Pairwise comparisons using log-rank test between TNM staging groups. Since the  $p$  value was significant, the two stages were not merged.

| TNM | II-IIIIB |
|-----|----------|
| IV  | 1.6e-06  |

**Table S9.** The features that contribute to a good and bad prognosis according to the LR and the LSVM.  $L(x,y,r)$ : the L function value of  $y$  in respect to  $x$  for distance  $r$ .

| Classifiers | Bad Prognosis              | Good Prognosis                                                                                                                                                                                                                                                                                                                                               |
|-------------|----------------------------|--------------------------------------------------------------------------------------------------------------------------------------------------------------------------------------------------------------------------------------------------------------------------------------------------------------------------------------------------------------|
| <b>LR</b>   | Density of TB frontin/core | Density of CD8 <sup>+</sup> frontin/frontout/core<br>Density of CD3 <sup>+</sup> frontout/core<br>Density of CD68 <sup>+</sup> frontin/frontout<br>$L(TB, CD3^+, 20)$                                                                                                                                                                                        |
| <b>LSVM</b> | Density of TB frontin/core | Density of CD8 <sup>+</sup> frontin/frontout/core<br>Density of CD3 <sup>+</sup> frontin/frontout/core<br>Density of CD68 <sup>+</sup> frontin/frontout/core<br>Number of CD3 <sup>+</sup> frontin<br>Number of PDL1 <sup>+</sup> CD163 <sup>+</sup> CD68 <sup>+</sup> frontout<br>Number of PDL1 <sup>+</sup> CD163 <sup>+</sup> CD68 <sup>+</sup> frontout |

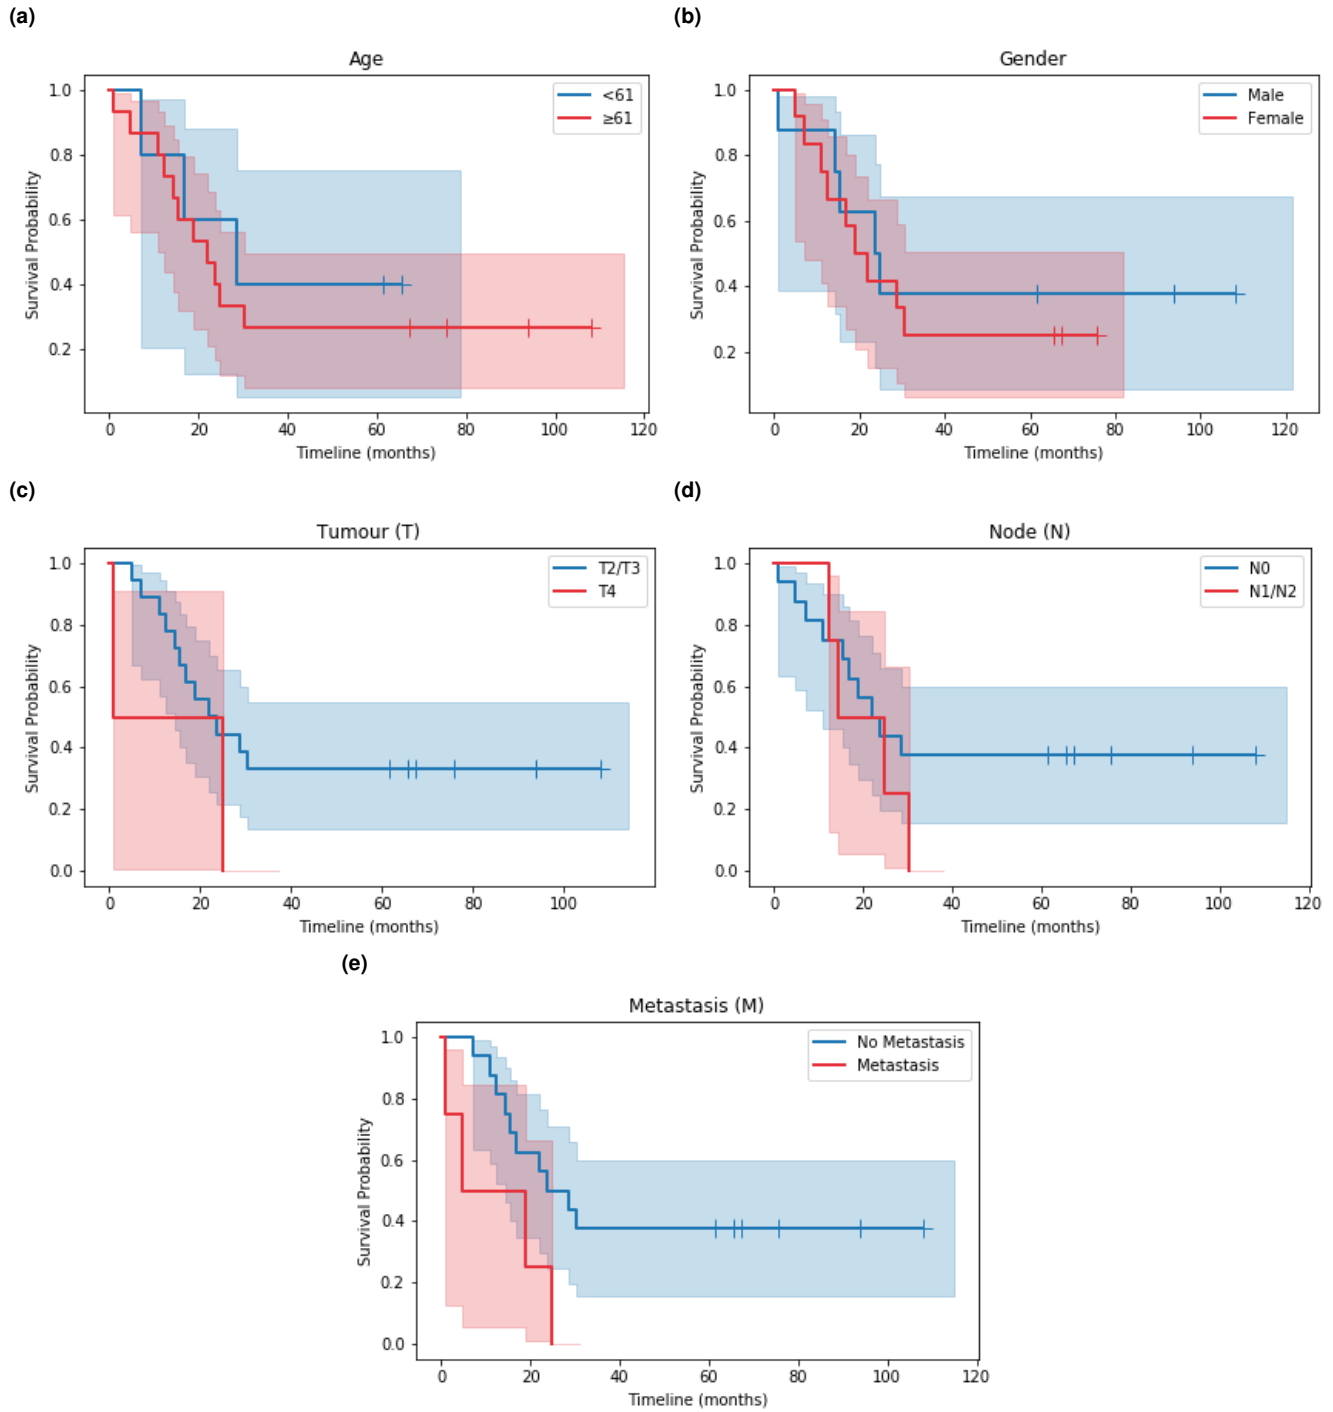

**Figure S3.** Kaplan-Meier curves of (a) Age ( $p$  value = 0.57,  $N_{<61} = 5$  &  $N_{\geq 61} = 15$ ), (b) Gender ( $p$  value = 0.62,  $N_{Female} = 12$  &  $N_{Male} = 8$ ), (c) Tumour ( $p$  value = 0.25,  $N_{T2/T3} = 10$  &  $N_{T4} = 2$ ), (d) Node ( $p$  value = 0.36,  $N_{N0} = 16$  &  $N_{N1/N2} = 4$ ), and (e) Metastasis ( $p$  value = 0.04,  $N_{No} = 16$  &  $N_{Yes} = 4$ ).

(a)

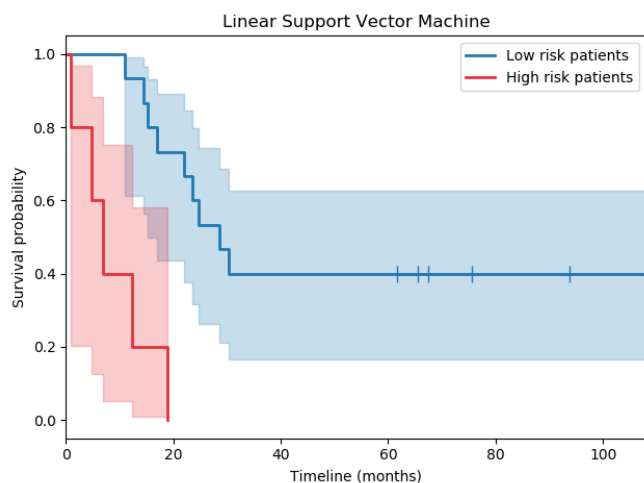

(b)

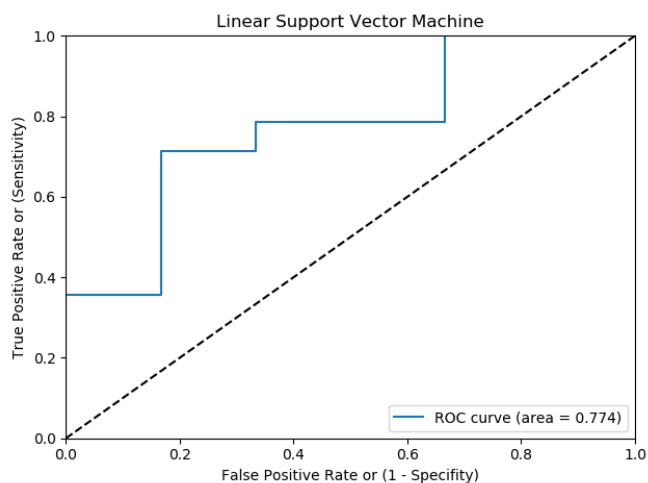

(c)

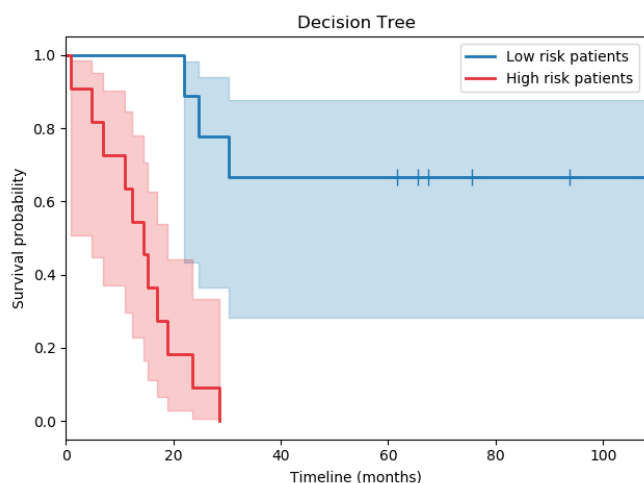

(d)

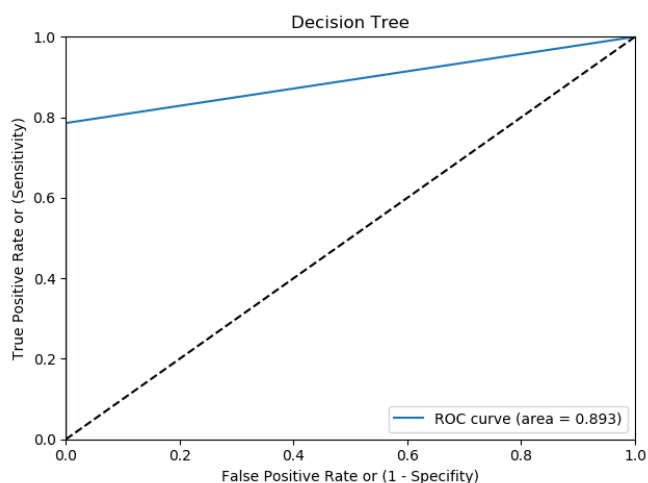

(e)

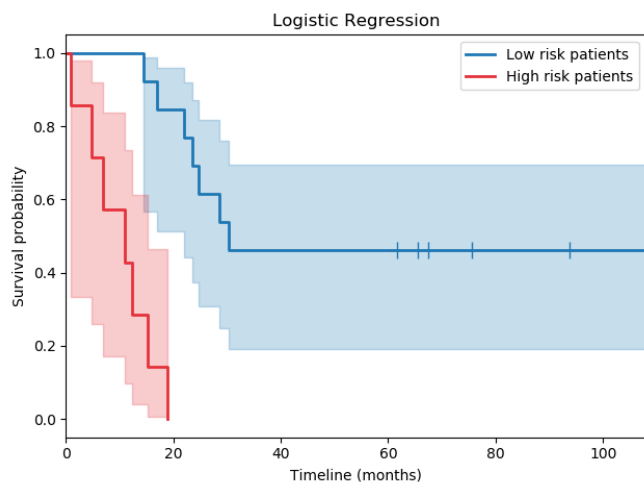

(f)

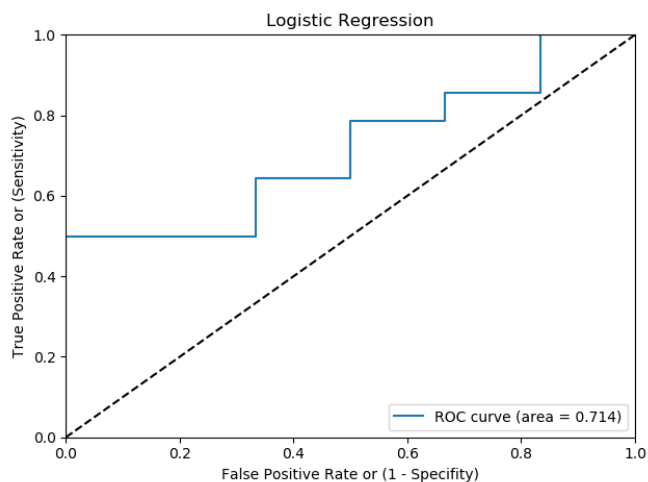

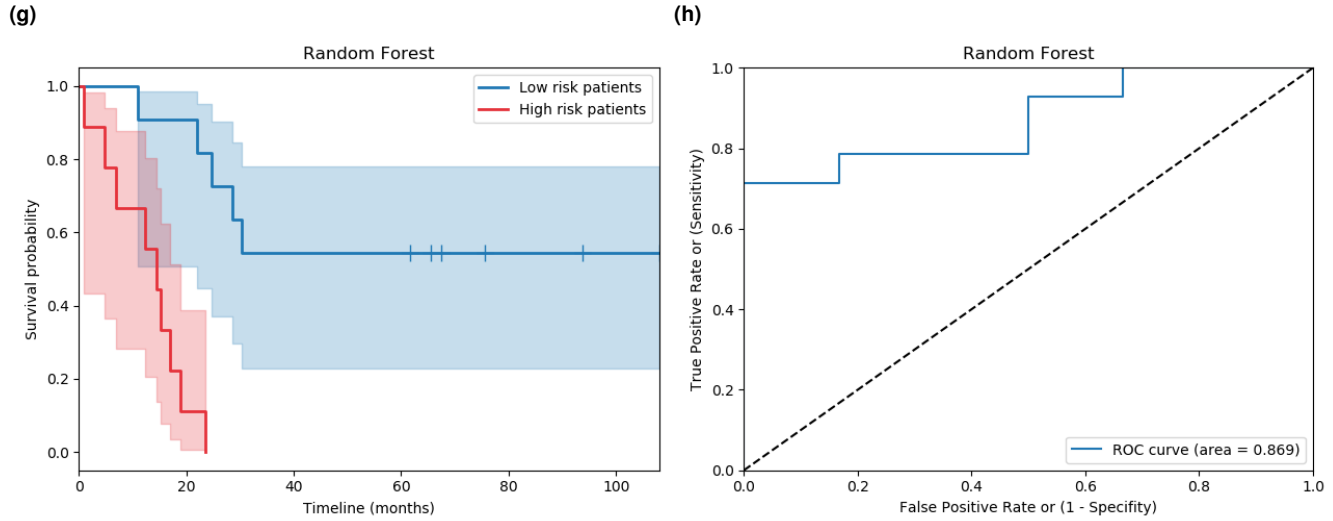

**Figure S4.** Kaplan-Meier and ROC curves on the testing set for each of the ML classifiers used in the ensemble model. (a–b) Image features ( $p$  value =  $6e - 05$ ,  $N_{LowRisk} = 15$  &  $N_{HighRisk} = 5$ ), (c–d) image and clinical features ( $p$  value =  $1e - 04$ ,  $N_{LowRisk} = 9$  &  $N_{HighRisk} = 11$ ), (e–f) image and spatial features ( $p$  value =  $5e - 05$ ,  $N_{LowRisk} = 13$  &  $N_{HighRisk} = 7$ ), (g–h) image, clinical, and spatial features ( $p$  value =  $8e - 06$ ,  $N_{LowRisk} = 11$  &  $N_{HighRisk} = 9$ ).

**Table S10.** The most important features for estimating patient prognosis by the DT and the RF.  $L(x,y,r)$ : the L function value of  $y$  in respect to  $x$  for distance  $r$ .

| Classifiers | Important Features                                                                                                                                                                                                                                                                                                                                                                                                                                                                                                                                                                                                                                                                                                                                                      |
|-------------|-------------------------------------------------------------------------------------------------------------------------------------------------------------------------------------------------------------------------------------------------------------------------------------------------------------------------------------------------------------------------------------------------------------------------------------------------------------------------------------------------------------------------------------------------------------------------------------------------------------------------------------------------------------------------------------------------------------------------------------------------------------------------|
| <b>DT</b>   | Number of PD-L1 <sup>+</sup> frontout<br>Density of CD163 <sup>+</sup> frontout<br>Density of PD-L1 <sup>+</sup> CK <sup>+</sup> core<br>Number of TB frontout<br>Density of CD3 <sup>+</sup> frontout<br>Number of CD68 <sup>+</sup> frontout<br>Density of CD68 <sup>+</sup> frontin/frontout                                                                                                                                                                                                                                                                                                                                                                                                                                                                         |
| <b>RF</b>   | Number of CD68 <sup>+</sup> frontout<br>Density of CD68 <sup>+</sup> frontin/frontout/core<br>Number of CD3 <sup>+</sup> core<br>Density of CD3 <sup>+</sup> frontout<br>Number of CD8 <sup>+</sup> frontout/core<br>Density of CD8 <sup>+</sup> frontout/core<br>Number of TB core<br>Density of PD-L1 <sup>+</sup> frontout<br>Density of PD-L1 <sup>+</sup> CK <sup>+</sup> core<br>Density of PD-L1 <sup>+</sup> CK <sup>-</sup> frontin/frontout<br>Number of CD163 <sup>+</sup> CD68 <sup>+</sup> frontout<br>Number of NucleiCK <sup>+</sup> frontin<br>TNM IIIA<br>TNM IV<br>L(TB, CD3 <sup>+</sup> , 20)<br>L(TB, CD8 <sup>+</sup> , 20)<br>L(TB, PD-L1 <sup>+</sup> , 20)<br>L(TB, CD8 <sup>+</sup> , 50)<br>L(CD163 <sup>+</sup> , PD-L1 <sup>+</sup> , 150) |

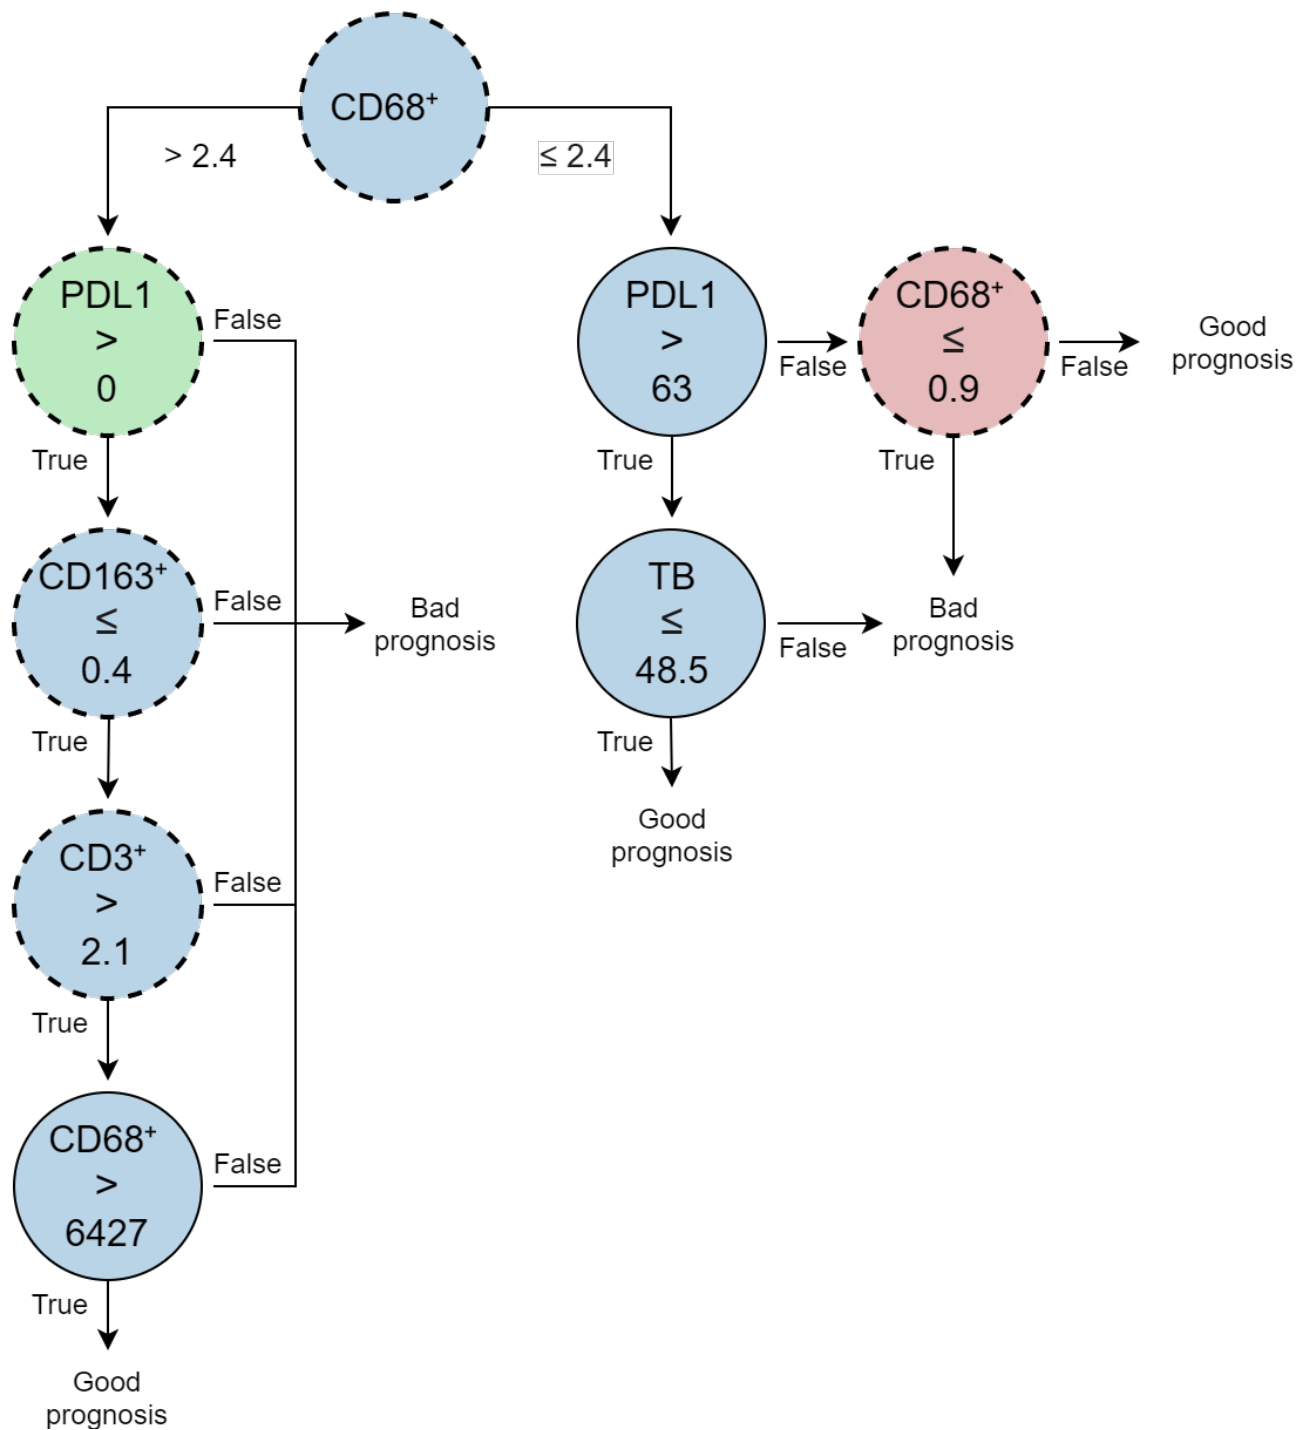

**Figure S5.** Diagram of the DT model employed by the ensemble model. *Solid-line circles: number of cells, dashed-line circles: density of cells. Tumour core in green, frontin in red and frontout in blue.*



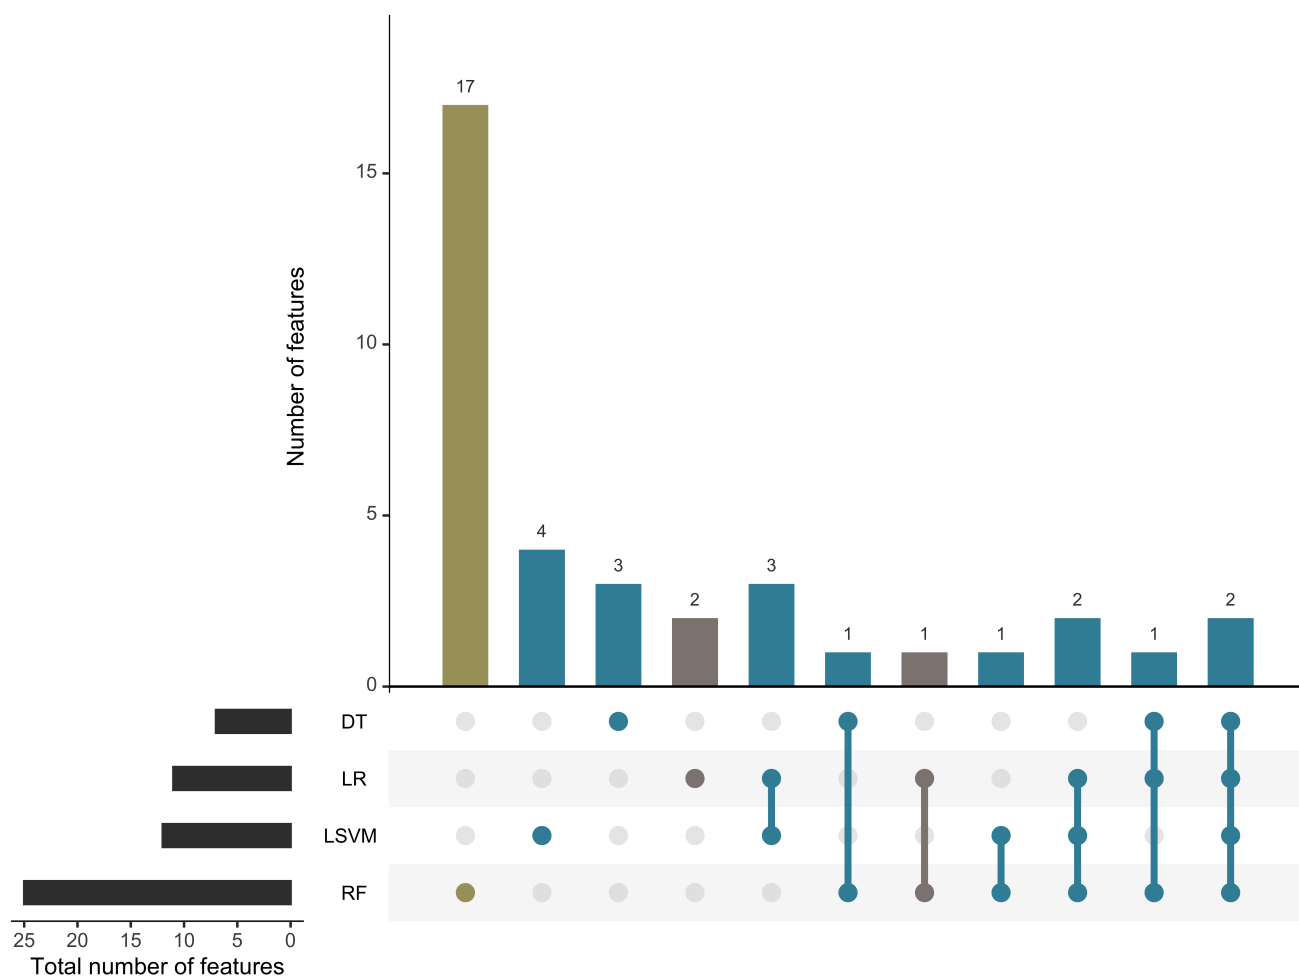

**Figure S6.** Intersecting features between the various submodels of our ensemble model. Gray denotes image and spatial features, blue denotes image features, and mustard denotes image, clinical, and spatial features. **The x-axis is a matrix layout that shows the feature intersections between the submodels.**
